1 **Title:** Alkyl gallates display elicitor activities in tobacco plants

2

3 **Running title:** Alkyl gallates in plant defence

4

5 **Authors:** Pascale Goupil<sup>1,2</sup> \*, Razik Benouaret<sup>1,2</sup>, Claire Richard<sup>3,4</sup>

6

7 **Affiliations:**

8 <sup>1</sup>Université Clermont Auvergne, UMR 547-UBP/INRA PIAF, Campus universitaire des Cézeaux, 8 avenue  
9 Blaise Pascal, 63178 Aubière cedex, France,

10 <sup>2</sup>INRA, UMR 547 PIAF, Clermont-Ferrand, France

11 <sup>3</sup>Université Clermont Auvergne, CNRS, UMR 6296, Campus universitaire des Cézeaux, Institut de Chimie de  
12 Clermont-Ferrand (ICCF), 24 avenue Blaise Pascal, 63178 Aubière cedex, France

13 <sup>4</sup>Equipe Photochimie CNRS, UMR 6296, ICCF, 63178 Aubière, France

14

15 \*Author for correspondence:

16 *Pascale Goupil*

17 *Phone: (33) 04 73 40 79 40*

18 *Fax: (33) 04 73 40 79 42*

19 *E-mail: pascale.goupil@uca.fr*

20

21 Date of submission: June 2<sup>nd</sup>, 2017

22 3457 words, 6 figures

23

24

25 **Authors' e-mails:** *pascale.goupil@uca.fr; rbenouaret@vertal.fr; claire.richard@uca.fr*

26

27     **Highlights**

28

29     – Alkyl gallates elicited defence reactions in tobacco

30     – Alkyl gallates induced local biochemical changes in tobacco leaves

31     – Alkyl gallates caused modification of plasma membrane properties

32     – Ethyl gallate led to defence transcript accumulation and dose-dependent cell death associated with  
33     hypersensitive response

34     – Alkyl gallates are novel elicitor agents well-suited to crop protection schemes.

35

## 36 Abstract

37

38 Alkyl gallates showed elicitor activities on tobacco in both whole plants and cell suspensions. Methyl gallate  
 39 (MG), ethyl gallate (EG) and *n*-propyl gallate (PG) infiltration into tobacco leaves induced hypersensitive  
 40 reaction-like lesions and topical production of autofluorescent compounds revealed under UV light. When  
 41 sprayed on tobacco plants at 5 mM, EG promoted upregulation of defence-related genes such as the  
 42 antimicrobial *PR1*,  $\beta$ -1,3-glucanase *PR2*, chitinase *PR3* and osmotin *PR5* target genes. Tobacco BY-2 cells  
 43 challenged with EG underwent cell death in 48 h, significantly reduced in the presence of the protease inhibitor  
 44 aprotinin. The three alkyl gallates all caused alkalinisation of the BY-2 extracellular medium, whereas gallic acid  
 45 did not trigger any pH variation. Using EGTA or  $\text{LaCl}_3$ , we showed that  $\text{Ca}^{2+}$  mobilisation occurred in BY-2  
 46 cells elicited with EG. Overall, our findings are the first evidence of alkyl gallate elicitor properties with early  
 47 perception events on plasma membrane, potential hypersensitive reactions and PR-related downstream defence  
 48 responses in tobacco.

49

50

51 **Keywords:** Alkyl gallates, BY-2, Elicitors, Ethyl gallate, Pathogenesis-related protein genes, Plant defence  
 52 reactions, Tobacco

## 53 **Introduction**

54 Open-field crops are always vulnerable to pathogens, and so extensive farming requires constant control of  
 55 pathogen populations. Synthetic pesticides are commonly used for direct pest control, but need repeated  
 56 spreading for season-long protection. Pesticide action is mostly selective and requires combinations of active  
 57 compounds in an integrated pest management approach. A promising alternative that emerged in the 1990s is  
 58 based primarily on improving the endogenous defence capabilities of plants. When plants are attacked by  
 59 pathogens, they defend themselves with an arsenal of defence mechanisms. These active plant defence responses  
 60 comprise three successive events: (i) recognition of the pathogen, (ii) signal transduction, and (iii) execution of  
 61 the defence programmes with activation of defence genes (Fu and Dong, 2013). The recognition events involve  
 62 pathogen- or plant-derived signalling entities termed elicitors (Choi and Klessig, 2016). Intracellular signal  
 63 conversion and transduction include the very early elicitor-induced signalling processes such as protein  
 64 phosphorylation, influx of  $\text{Ca}^{2+}$ , efflux of  $\text{H}^+$ ,  $\text{K}^+$  and  $\text{Cl}^-$  leading to extracellular alkalinisation, depolarisation of  
 65 the plasma membrane, and active oxygen species production, culminating in the hypersensitive response, a  
 66 localised cell suicide (Yang *et al.*, 2011). Ultimately, the pathogen challenge leads to the production of  
 67 phytoalexins and pathogenesis-related proteins, which prevent pathogen development. Point inoculation of the  
 68 pathogen, in addition to triggering the local acquired resistance response (LAR), can mobilise systemic acquired  
 69 resistance (SAR), which alerts and predisposes the tissues to a more intensive response on subsequent infection  
 70 (Kachroo and Robin, 2013; Fu and Dong, 2013). Salicylic acid (SA) plays a crucial role in the SAR induction  
 71 processes. SA is involved in the signal transduction systems by activating enzyme expression catalysing  
 72 biosynthetic reactions to produce defence compounds (Chen *et al.*, 2009; Boatwright and Pajerowska-Mukhtar,  
 73 2013) and provide protection for plants against pathogens.

74 As it is pathogenesis that initiates SAR, impact on disease is lower than if the SAR response had been activated  
 75 before the arrival of the pathogen. The use of plant defence inducers (PDIs) to establish SAR intentionally and  
 76 preventively in plants are thus currently a promising strategy in phytoprotection. PDIs are organic, inorganic,  
 77 botanical or synthetic stimulus-triggering factors (elicitors) that mobilise plant defence reactions (Walters *et al.*,  
 78 2013; Lyon, 2014). By stimulating plant immunity, PDIs provide defence against subsequent infection (Gozzo  
 79 and Faoro, 2013; Walters *et al.*, 2013). To date, only very few substances with high SAR activity have been  
 80 described (Gozzo and Faoro, 2013), and they mostly combine PDI and pesticide actions, not necessarily a  
 81 disadvantage since both properties are inimical to pathogens (Dewen *et al.*, 2017).

82 Agricultural applications of plant activators are far from valued (Gozzo and Faoro, 2013). The synthetic  
83 agrochemicals now available are SA-like substances that mimic the action of this phytohormone. Of these, 2,6-  
84 dichloro isonicotinic acid (INA) and acibenzolar-S-methyl (BTH) and their derivatives are the most thoroughly  
85 studied, currently marketed as BOOST®, Bion® and Actigard™. These resistance activators serve as efficient  
86 chemical inducers of SAR, with effectiveness against diverse plant diseases (Bektas and Eulgen, 2015; Dufour  
87 *et al.*, 2016).

88 The identification of new chemicals able to induce disease resistance is beneficial not only for elucidating the  
89 pathways leading to SAR, but also for developing new plant protection agents. The effectiveness of various  
90 elicitors depends on plant taxonomy, and there are many examples where an elicitor is more effective on some  
91 plant species than on others (Lyon, 2014). We have been engaged in seeking naturally-occurring or synthetic  
92 substances able to induce SAR reactions. As part of this research we evaluated the PDI activity of alkyl gallates  
93 (3,4,5-trihydroxybenzoates) on tobacco plants. Gallic acid derivatives had already been found to display  
94 antimicrobial properties. Octyl, nonyl and lauryl gallates exhibit fungicidal and bacterial activity (Kubo *et al.*,  
95 2002; Leal *et al.*, 2009). Silva *et al.* (2013) showed their potential for use in disease management, evaluating the  
96 inhibitory activity of a set of gallic acid alkyl esters on the plant pathogenic bacterium *Xanthomonas citri*. Here  
97 we demonstrate for the first time that alkyl gallates act at various points in the signalling pathway leading to  
98 defence reactions. We report evidence that treatment of tobacco with methyl, ethyl and *n*-propyl gallates induces  
99 hypersensitive-like reactions with activation of defence-related genes in the tobacco plant. These gallic acid  
100 derivatives trigger rapid extracellular alkalinisation of BY-2 plant cells with Ca<sup>2+</sup> mobilisation, suggesting that  
101 tobacco cells perceive the chemicals by modifying plasma membrane physical properties. Finally, the naturally-  
102 occurring and semisynthetic gallic acid derivatives revealed potent PDI actions, revealing a valuable source of  
103 compounds that could find use in green agriculture practices.

104

## 105 **Materials and Methods**

### 106 *Biological compounds and chemicals*

107 Methyl gallate (MG), ethyl gallate (EG), *n*-propyl gallate (PG), salicylic acid (SA), and gallic acid (GA) were  
108 purchased from Sigma-Aldrich (Saint-Quentin-Fallavier, France). All the compounds were dissolved in ultrapure  
109 water (MilliQ). PG needed warm (25 °C) ultrapure water to dissolve completely.

110

# 111 *Plant material and treatments*

112 The biological activity of alkyl gallates was measured on 3-month old tobacco plants (*Nicotiana tabacum* L.)  
 113 bearing 20–22 leaves (preflowering stage). Tobacco plants were grown in a greenhouse under controlled  
 114 conditions ( $22 \pm 5$  °C with a photoperiod of 16 h light). The chemical solutions to be tested (50 µl) were  
 115 infiltrated into the leaf tissue using a plastic syringe (without a needle), on an area of 1–2 cm<sup>2</sup>. As a positive  
 116 control, leaves were infiltrated with 2 mM SA. For the negative control, leaves were infiltrated with ultrapure  
 117 water. The compounds were infiltrated into distinct areas on the same leaf for the examination of macroscopic  
 118 symptoms under bright field or UV light (at 312 nm). For PR transcript quantification, three mature leaves were  
 119 sprayed on both their upper (adaxial) and lower (abaxial) surfaces. Foliar spray treatments were administered  
 120 with a fine atomiser until the solutions dripped (3 mL per leaf on average). The negative control was leaves  
 121 sprayed with ultrapure water.

122 Tobacco cell suspensions of *Nicotiana tabacum* L. cv. Bright Yellow-2 (BY-2) were grown in MS medium  
 123 (Duchefa, Netherlands) supplemented with sucrose (30 g.L<sup>-1</sup>), thiamine (1 mg.L<sup>-1</sup>), myo-inositol (102 mg.L<sup>-1</sup>)  
 124 and 2,4-dichlorophenoxyacetic acid (0.2 mg.L<sup>-1</sup>) at pH 5.8. Cells were agitated in the dark (140 rpm, 25 °C) and  
 125 subcultured weekly by dilution at a 1:15 ratio in fresh medium. For determination of extracellular pH changes,  
 126 cells from culture in exponential-phase growth were collected by filtration, washed with 175 mM mannitol, 0.5  
 127 mM CaCl<sub>2</sub>, 0.25 mM MgCl<sub>2</sub>, 1 mM KCl and 1 mM sucrose, and resuspended at 0.1 g fresh weight (FW)/mL in  
 128 the same medium. The initial pH was about 4.8. For transcript accumulation analysis, cells were collected by  
 129 filtration, and resuspended at 0.3 g FW/mL in fresh MS medium using open 6-well microplates (Greiner Bio-  
 130 one, Germany). Cells were first equilibrated for 2 h with continuous stirring before elicitation with alkyl gallates.

131

# 132 *Transcription levels of defence genes*

133 The patterns of PR gene expression were analysed by real-time quantitative PCR (RT-qPCR) using SYBR-green  
 134 and the iCycler iQv5 (Bio-Rad). Total RNA was extracted from tobacco leaf tissue (200 mg) in  
 135 cetyltrimethylammonium bromide extraction buffer, as described by Chang *et al.* (1993). Total RNA was  
 136 cleaned up with 0.5 U DNase I solution (Euromedex, France) containing 20 U RNase inhibitor (Euromedex,  
 137 France). RNA integrity was verified on a 1% agarose gel by detecting ribosomal RNA. RNA concentrations

were measured spectrophotometrically at 260 nm. First-strand cDNA was synthesised from up to 1 µg of total RNA with Euroscript Reverse Transcriptase (Eurogentec, France) according to the manufacturer's instructions. PCR reactions were prepared using the qPCR kit Mastermix for SYBR green (Eurogentec) according to the manufacturer's protocol. The cDNA concentration used produced a threshold cycle value ( $C_T$ ) of between 15 and 30 cycles. Amplification specificity was checked by melting-curve analysis. The relative quantity ( $Q_R$ ) of PR gene transcripts using the EF-1 $\alpha$  gene (Peng *et al.*, 2004) as internal standard was calculated with the delta-delta mathematical model (Pfaffl 2001). Values are given as  $\log_2 Q_R$ . For every PR gene analysed, three independent biological replicates were run, and every run was carried out at least in triplicate. Primers and amplicon sizes are given in Benouaret and Goupil (2015).

#### *BY-2 Extracellular alkalinisation*

The pH variations of the culture medium were recorded by introducing a glass microelectrode (Hanna Instrument, HI1330B, France) into 6 ml of the equilibrated cell suspension culture. The pH was measured every 10 min starting immediately after treatment with elicitors or ultrapure water (negative control). The  $\Delta$ pH was the pH measured every 10 min relative to the pH measured at  $t_0$  immediately after adding elicitors or ultrapure water. Each experiment was repeated at least three times to check reproducibility. Figures depict the results of typical experiments. Pharmacological treatments were conducted using the chelator EGTA (2 mM) and the Ca<sup>2+</sup> channel blocker LaCl<sub>3</sub> (2 mM).

#### *Cell death measurement*

The Evans Blue assay was performed according to Amano *et al.* (2003) using a plastic syringe device. The pigment enters cells with damaged plasmalemma. The assay was first calibrated with a set of viability standards using mixtures of living and dead tobacco BY-2 cells (Benouaret *et al.*, 2014). Tobacco cells (500 µL) were withdrawn from the culture medium immediately ( $t_0$ ) and then 24 h after elicitation. Pharmacological treatment was conducted with the serine protease inhibitor aprotinin (0.2 µM) 30 min before cell death rate determination. Absorbance at 600 nm was measured to estimate cell death. Each experiment was repeated three times with three independent BY-2 cultures.

## Results

### *Macroscopic changes of tobacco tissues challenged with alkyl gallates*

Foliar tobacco tissues were infiltrated with the three alkyl gallates (Fig. 1) at 5 mM, and the macroscopic changes were examined under bright and UV light. Fig. 2 shows the kinetics of appearance of macroscopic symptoms on the abaxial face of tobacco leaves exposed to bright light (Fig. 2A-D) and UV light (Fig. 2E-H). UV light examination ( $\lambda = 312$  nm) revealed that the methyl gallate (MG)-, ethyl gallate (EG)- and *n*-propyl gallate (PG)-infiltrated zones and the surrounding tissues displayed autofluorescence indicative of the accumulation of phenolic compounds (Fig. 2F-H). At 2 and 4 dpi, tobacco mesophyll infiltrated with MG was unchanged under bright light, but the chemical induced autofluorescence in the surrounding tissues. A restricted chlorotic zone appeared at 8 dpi without production of fluorescent compounds. By contrast, the EG-infiltrated tissues turned chlorotic by 4 dpi and tissue injury was enlarged at 8 dpi. The surrounding zone was loaded with phenolic compounds. The PG-infiltrated tissues showed the most pronounced signs, with restricted brown areas at 2 dpi and a brown extended zone at 4 and 8 dpi. Examination of the leaf tissue by UV light revealed that the necrotic zone was surrounded by a scattered pattern of fluorescence. Overall, tobacco leaves were receptive to the three alkyl gallates tested. Since the alkyl gallates themselves did not emit fluorescence (Fig. 2E), these results evidence that the chemical compounds induced marked metabolic changes over the interveinal areas of the leaves. The naturally-occurring EG was retained for further work, since it proved highly active in inducing accumulation of autofluorescent compounds.

A dose-response experiment was undertaken on EG-infiltrated tobacco tissues. Macroscopic symptoms were examined under bright and UV light for EG concentrations ranging from 5 mM to 0.5 mM. Fig. 3 shows the infiltrated areas at 4 dpi. The 5 mM-infiltrated zone appeared slightly chlorotic and displayed a large fluorescent surrounding area. Expansion of autofluorescence was induced dose-dependently. EG infiltration at 2 mM resulted in faint autofluorescence, and at 1 mM had no effect. As expected, SA (2 mM) induced a necrotic area with local accumulation of fluorescent compounds.

### *Responses of cultured cells to alkyl gallates*



We used medium alkalinisation as a readily measurable effect on suspension-cultured BY-2 cells to test the potential elicitor activity of alkyl gallates. As shown in Fig. 4A, alkalinisation of the culture medium in response to AG was evidenced for the 1 mM and 5 mM concentrations. Suspended cells responded to AG by a rapid, sustained alkalinisation of the incubation medium. Extracellular alkalinisation was detected immediately after adding the AG. The three alkyl gallates induced a  $\Delta$ pH reaching 0.8 to 1.1 units at 1 mM and 1.5 to 1.8 units at 5 mM after 150 min. Fig. 4B shows that the extent of pH variation was dose-dependent in the concentration range used for EG. The threshold value was not reached in our experimental system; the lowest concentration (0.5 mM) could still cause a pH change of 0.8 units. As expected, no pH shift was detected with the control cells treated with water.

The calcium mobilisation in EG-induced pH changes was investigated by adding the chelator agent EGTA (2 mM) and the  $\text{Ca}^{2+}$ -channel blocker  $\text{LaCl}_3$  (2 mM) to the culture medium concomitantly with the EG. Both chemicals radically suppressed the pH shift. Adding the chemicals during the alkalinisation phase, i.e. 30 min after elicitation, resulted in rapid abolition of the pH rise. EDTA and  $\text{LaCl}_3$  had an inverse effect on the extracellular pH medium in control cells, with slight medium acidification (Fig. 4C).

The eliciting activity of gallic acid (GA) was measured by medium pH determination. Addition of GA at 0.5 mM and 5 mM to the BY-2 cell suspension did not trigger any pH variation in the extracellular medium, suggesting that the compound was not perceived by the tobacco cells, at least as noted above (Fig. 4D).

The EG-triggered hypersensitive-like response was investigated in BY-2 cells using the Evans blue test (Fig. 5). Cell death rate was measured in tobacco cells exposed to EG at 0.5 mM, 2 mM and 5 mM for 48 h (Fig. 5A). Cell death rate was 10% on average in control cells (without EG). The EG elicitation induced significantly higher cell death. The exposure of tobacco cells to 2 mM and 5 mM EG increased the magnitude of the cell death rate, which reached 25% and 45% respectively. The action of the plant cell death inhibitor aprotinin was examined on 5 mM EG-elicited cells. As shown in Fig. 5B, the protease inhibitor lowered cell death rate by 19%, whereas the inhibitor did not affect cell viability in control tobacco cells.

#### *Ethyl gallate-induced PR transcript accumulation*

The ability of EG to induce defence-related gene expression was investigated in tobacco plants. Transcript levels of four PR target genes were quantified by quantitative real-time PCR in EG-treated leaves 4 days after spraying.

At 1 mM, EG failed to induce significant transcript accumulation of the four PR markers. At 5 mM, EG led to high PR transcript accumulation: 60-fold for PR1, 50-fold for PR2, 35-fold for PR3, and 30-fold for PR5, on average (Fig. 6).

## Discussion

The present work demonstrates the ability of three alkyl gallates to elicit plant defence reactions. Using tobacco as a plant model, we show the potential of methyl gallate (MG), ethyl gallate (EG) and *n*-propyl gallate (PG) to trigger local injuries, biochemical changes and PR transcript accumulation. Infiltration of tobacco leaves with the chemicals resulted in foliar symptoms and local accumulation of fluorescent compounds. The three compounds induced restricted chlorotic tissues visualised under bright light, with production of phenolics in the surrounding areas, suggesting cell death initiation of the mesophyll cells. The topical reactions induced by the three alkyl gallates were of different severity in terms of tissue injury and production of phytoalexin-like entities. The fact that the intensity of effects varied with the alkyl gallates (MG < EG < PG) suggests that the compounds were active to different degrees at the 5 mM concentration, or that their modes of action differed in the necrotic reaction associated with cell death. EG and PG seemed to be the most potent inducers of local cell death in our experiment. Localised cell death in plant tissue resulting from attack by pathogens can occur either in hypersensitive resistant response or in harmful reactions such as necrosis potentially caused by toxins (Iakimova *et al.*, 2005). We demonstrate here that BY-2 cell death is sensitive to protease inhibitor, suggesting that infiltrated tobacco tissues may evolve towards hypersensitive status. However, phytotoxic reactions caused by alkyl gallate cannot be ruled out.

Rapid changes in membrane permeability are involved in plant defence-associated early responses to various biotic elicitors (Garcia-Brugger *et al.*, 2006). Increased influx of protons and calcium mobilisation are both early events in the elicitor signalling network. Perception of alkyl gallates visualised by the pH rise in the incubation medium was evidenced on BY-2 cells. Medium alkalinisation is one of the very early events occurring in elicitor-binding sites in plant cells (Zhao *et al.*, 2005), and results from elicitor-induced depolarisation of the plasma membrane with subsequent K<sup>+</sup>/H<sup>+</sup> exchanges and Ca<sup>2+</sup> influx/Cl<sup>-</sup> efflux. In our experiments, the effect of Ca<sup>2+</sup> influx inhibitors EGTA or LaCl<sub>3</sub> caused the decreased pH shift of the extracellular medium, suggesting that Ca<sup>2+</sup> mobilisation occurred in BY-2 cells elicited with alkyl gallates. As a consequence of ion fluxes, a predictive cytoplasmic acidification should take place rapidly in BY-2 cells. Cytoplasmic acidification is regarded as an

essential step in signal transduction, leading to early defence gene expression and secondary metabolite biosynthesis (Sakano, 2001).

Kinetics of extracellular pH changes vary among elicitors, with two main different behaviours towards cells. According to the nature of the elicitor, the perception can induce a long-sustained pH rise, or the pH variation can be transient, with a return to the resting value. It is noteworthy that the modification of H<sup>+</sup> flux in BY-2 cells following treatment by alkyl gallates was similar to the defence response elicited by a polyphenolic-enriched grape extract (Benouaret *et al.*, 2014). The induced H<sup>+</sup> flux modification lasting 150 min presented similar characteristics in the respective time course of the effect. This result suggests that the underlying processes are basically the same. EG is a naturally-occurring gallic acid derivative found in several plant sources and identified in wines from different varieties of *Vitis vinifera* (Monagas *et al.*, 2005). It was not detected in a red winery by-product extract (data not shown), suggesting that this biomolecule is not active in grape marc extract.

Alkyl gallates are antioxidants. One of the earliest cellular responses following elicitor recognition is oxidative burst with production of active oxygen species (AOS). Despite their damaging effect, AOS are well-described second messengers producing plant responses. Whether AOS will act as a destructor or as a signalling entity depends on the equilibrium between AOS production and scavenging. Low concentrations of AOS act as signalling entities mediating the plant responses: however, high concentrations cause acute damage to cell components (Sharma *et al.*, 2012). In elicitor-challenged cells, disruption in cellular redox homeostasis appear to switch on a signalling cascade leading to programmed cell death, encountered during hypersensitive response (HR) (Van Breusegem and Dat, 2006). Using pharmacological approaches, our group came near to the hypersensitive status of BY-2 cells that led to cell death on EG treatment. In this BY-2 system, the antioxidant gallates acting as free radical scavengers could subsequently help to reduce physiological AOS equilibrium and induce HR-related cell death. The potential ability of phenolics to induce HR-related cell death has been previously demonstrated with polyphenolic-enriched grape marc extracts (Benouaret *et al.*, 2014). Even though EG was not detected in the grape marc extracts, it can be assumed that the antioxidant properties of polyphenolics could be involved in HR establishment. Investigation of AOS as potential agents with pharmacological approaches will help to characterise the pathways leading to the hypersensitive status of EG-induced cell death in tobacco.

Alkyl gallates evidently activate the SAR pathway, since they induced expression of the same set of SAR genes, i.e. *PR1*, *PR2*, *PR3* and *PR5*, that are induced by SA (Cordelier *et al.*, 2003). Numerous synthetic and/or bio-

based elicitors can induce plant immune responses. The most marked chemical ones, acibenzolar-*S*-methyl (ASM) and 2,6-dichloroisonicotinic acid (INA), both induce SAR without SA accumulation; probenazole (PBZ) induces SAR through SA biosynthesis (Bektas *et al.*, 2015; Burketova *et al.*, 2015). SA involvement in alkyl gallate-regulated plant defences and the potential of these compounds to protect cultivated crops are being investigated in laboratory studies.

In conclusion, the present work offers evidence for plant immunity inducer properties of alkyl gallates. Plants can synthesise a wide range of phenolics as an integral part of their non-host resistance strategy. These secondary metabolites are natural defensive antibiotics, ensuring efficient chemical barriers to pathogens. Their elicitation properties are demonstrated here for the first time in alkyl gallates, which emerge as PDI agents suited to phytoprotection. Being naturally-occurring and ubiquitous, EG is the most promising of these agents. It is potentially non-toxic for the human being, and offers consumer benefits, with antioxidant, anti-inflammatory and anticarcinogenic activities. Given that EG can play a dual role in plant protection, as it also possesses direct antimicrobial activities, this biocontrol agent constitutes a potent product well-suited to environmentally-oriented schemes for high crop protection.

## Acknowledgements

The authors thank Céline Sac for help with the tobacco cell cultures and laboratory assistance, and Dominique Marcon for technical assistance in photographic editing.

## References

- Amano T, Hirasawa K-I, O'Donohue M, Pernolle JC, Shioi Y.** 2003. A versatile assay for the accurate, time-resolved determination of cellular viability. *Analytical Biochemistry* **314**, 1-7.
- Bektas Y, Eulgem T.** 2015. Synthetic plant defense elicitors. *Frontiers in Plant Science* **5**, 804.
- Benouaret R, Goujon E, Goupil P.** 2014. Grape marc extract causes early perception events, defence reactions and hypersensitive response in cultured tobacco cells. *Plant Physiology and Biochemistry* **77**, 84-89.
- Benouaret R, Goupil P.** 2015. Grape marc extract-induced defence reactions and protection against *Phytophthora parasitica* are impaired in NahG tobacco plants. *Journal of Agricultural and Food Chemistry* **63**, 6653-6659.
- Boatwright JL, Pajerowska-Mukhtar K.** 2013. Salicylic acid: an old hormone up to new tricks. *Molecular Plant Pathology* **14**, 623-634.
- Burketova L, Trda L, Ott P.G, Valentova O.** 2015. Bio-based resistance inducers for sustainable plant protection against pathogens. *Biotechnology Advances* **33**, 994-1004.
- Chang S, Puryear J, Cairney J.** 1993. A simple and efficient method for isolating RNA from pine trees. *Plant Molecular Biology Reporter* **11**, 113-116.
- Chen Z, Zheng Z, Huang J, Lai Z, Fan B.** 2009. Biosynthesis of salicylic acid in plants. *Plant Signal & Behavior* **4**, 493-496.
- Choi HW, Klessig DF.** 2016. DAMPS, MAMPS, and NAMPS in plant innate immunity. *BMC Plant Biology*, **16**: 232.
- Cordelier S, de Ruffray P, Fritig B, Kauffmann S.** 2003. Biological and molecular comparison between localized and systemic acquired resistance induced in tobacco by a *Phytophthora megasperma* glycoprotein elicitor. *Plant Molecular Biology* **51**, 109-118.
- Dewen Q, Yijie D, Yi Z, Shupeng Li, Fachao S.** 2017. Plant immunity inducer development and application. *Molecular Plant-Microbe Interactions* **30**, 355-360.

328 **Dufour M-C, Magnin N, Dumas B, Vergnes S, Corio-Costet M-F.** 2016. High-throughput gene-expression  
329 quantification of grapevine defense responses in the field using microfluidic dynamic arrays. *BMC Genomics*  
330 **17**, 957.

331 **Fu ZQ, Dong X.** 2013. Systemic acquired resistance: turning local infection into global defense. *Annual Review*  
332 *of Plant Biology* **64**, 839-863.

333 **Garcia-Brugger A, Lamotte O, Vandelle E, Bourque S, Lecourieux D, Poinssot B, Wendehenne D, Pugin**  
334 **A.** 2006. Early signaling events induced by elicitors of plant defenses. *Molecular Plant Microbe Interactions* **19**,  
335 711-724.

336 **Gozzo F, Faoro F.** 2013. Systemic acquired resistance (50 years after discovery): moving from the lab to the  
337 field. *Journal of Agricultural and Food Chemistry* **61**, 12473-12491.

338 **Iakimova ET, Michalczuk L, Woltering EJ.** 2005. Hypersensitive cell death in plants- Its mechanisms and role  
339 in plant defence against pathogens. *Journal of Fruit and Ornamental Plant Research* **13**, 135-158.

340 **Kachroo A, Robin GP.** 2013. Systemic signaling during plant defense. *Current Opinion in Plant Biology* **16**,  
341 527-533.

342 **Kubo I, Xiao P, Fujita K.** 2002. Anti-MRSA activity of alkyl gallates. *Bioorganic & Medicinal Chemistry*  
343 *Letters* **12**, 113-116.

344 **Leal PC, Mascarello A, Derita M, Zuljan F, Nunes RJ, Zacchino S, Yunes RA.** 2009. Relation between  
345 lipophilicity of alkyl gallates and antifungal activity against yeasts and filamentous fungi. *Bioorganic &*  
346 *Medicinal Chemistry Letters* **19**, 1793-1796.

347 **Lyon G.** 2014. Agents that can elicit induced resistance. In: Walters DR, Newton A, Lyon G, eds. *Induced*  
348 *resistance for plant defence. A sustainable approach to crop protection.* Blackwell Publishing Ltd, Oxford, 11-40.

349 **Monagas M, Suárez R, Gómez-Cordovés C, Bartolomé B.** 2005. Simultaneous determination of  
350 nonanthocyanin phenolic compounds in red wines by HPLC-DAD/ESI-MS. *American Journal of Enology and*  
351 *Viticulture* **56**, 139-147.

352 **Peng J-L, Bao Z-L, Ren H-Y, Wang J-S, Dong H-S.** 2004. Expression of harpin<sub>Xoo</sub> in transgenic tobacco  
353 induces pathogen defense in the absence of hypersensitive cell death. *Phytopathology* **94**, 1048-1055.

354 **Pfaffl MW.** 2001. A new mathematical model for relative quantification in real-time RT-PCR. *Nucleic Acids*  
355 *Research* **29**, 2002-2007.

356 **Sakano K.** 2001. Metabolic regulation of pH in plant cells: role of cytoplasmic pH in defense reactions and  
357 secondary metabolism. *International Review of Cytology* **206**, 1-44.

358 **Sharma P, Jha AB, Dubey RS, Pessarakli M.** 2012. Reactive oxygen species, oxidative damage, and  
359 antioxidative defense mechanism in plants under stressful conditions. *Journal of Botany* **2012**, 1-26.

360 **Silva IC, Regasini LO, Petrônio MS, Silva DHS, Bolzani VS, Belasque J, Sacramento LVS, Ferreira H.**  
361 2013. Antibacterial activity of alkyl gallates against *Xanthomonas citri subsp. Citri*. *Journal of Bacteriology* **195**,  
362 85-94.

363 **Van Breusegem F, Dat JF.** 2006. Reactive oxygen species in plant cell death. *Plant Physiology* **141**, 384-390.

364 **Walters DR, Ratsep J, Havis ND.** 2013. Controlling crop diseases using induced resistance: challenges for the  
365 future. *Journal of Experimental Botany* **64**, 1263-1280.

366 **Yang Y, Shah J, Klessig DF.** 2011. Signal perception and transduction in plant defence responses. *Genes Dev*  
367 **11**, 1621-1639.

368 **Zhao J, Davis LC, Verpoorte R.** 2005. Elicitor signal transduction leading to production of plant secondary  
369 metabolites. *Biotechnology Advances* **23**, 283-333.

370

## Figure captions

Fig. 2 and Fig. 3 to be in colour on-line only

**Fig. 1.** Structures of the active ingredients studied

**Fig. 2.** Macroscopic symptoms induced in tobacco leaves by methyl gallate (MG), ethyl gallate (EG) and *n*-propyl gallate (PG) infiltration observed under bright field (A-D) and UV light (E-H) at 0 dpi (A,E), 2 dpi (B,F), 4 dpi (C,G) and 8 dpi (D,H). Alkyl gallates were infiltrated at 5 mM. Bars 2 cm

**Fig. 3.** Macroscopic symptoms induced in tobacco leaves by EG infiltration observed under bright field (A) and UV light (B) at 4 dpi. Tobacco leaves were infiltrated with different EG concentrations: 5 mM (1), 4 mM (2), 3 mM (3), 2 mM (4), 1 mM (5) and 0.5 mM (6), ultrapure water (control), 2 mM SA. Bars 1 cm

**Fig. 4.** Extracellular alkalinisation in tobacco BY-2 suspension cells over time elicited with methyl gallate (MG), ethyl gallate (EG), and *n*-propyl gallate (PG). A. Alkyl gallates used at 5 and 1 mM, B. EG in the presence of  $\text{Ca}^{2+}$  inhibitors. EGTA and  $\text{LaCl}_3$  at 2 mM were added to the BY-2 medium at the onset of elicitation or at 30 min (arrow), C. EG added at 0.5 to 5 mM, D. Gallic acid (GA) and EG used at 5 and 0.5 mM. The control is water. The data are from representative experiments out of a total of five.

**Fig. 5.** Cell death rate assessed by Evans Blue staining of tobacco BY-2 cell suspension treated with ethyl gallate (EG) at 0.5, 2 and 5 mM for 48 h. The protease inhibitor aprotinin was added 30 min before cell death measurement in BY-2 cells treated with water (control) or 5 mM EG. Values are expressed relative to control (water treatment) values. The experiments were performed in triplicate with three different BY-2 cultures. Bars represent means  $\pm$ SEM. Letters indicate significant differences between treated and control samples according to one-way ANOVA followed by LSD test ( $p \leq 0.05$ ). Bars represent the mean values  $\pm$  SE,  $p \leq 0.05$ .



396

397 **Fig. 6.** PR transcript accumulation in tobacco leaves 4 days after 2 mM SA (positive control) or 1 and 5 mM  
 398 ethyl gallate (EG) spraying. Transcripts were quantified by real-time RT-PCR in the sprayed leaves. Values are  
 399 expressed relative to control (water treatment) values. Three leaves per plant were treated for each experiment.  
 400 Each independent experiment was performed in triplicate. Bars represent means  $\pm$  SEM. Letters indicate  
 401 significant differences between treated and control samples according to one-way ANOVA followed by LSD test  
 402 ( $p \leq 0.05$ ).

Fig.1

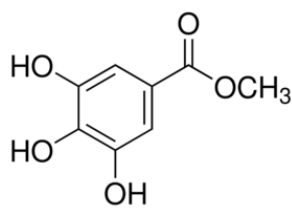

Methyl gallate

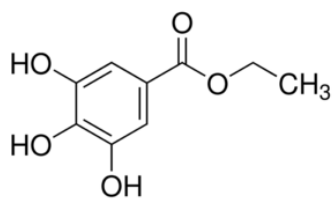

Ethyl gallate

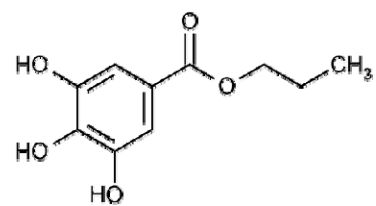

Propyl gallate

Fig.2

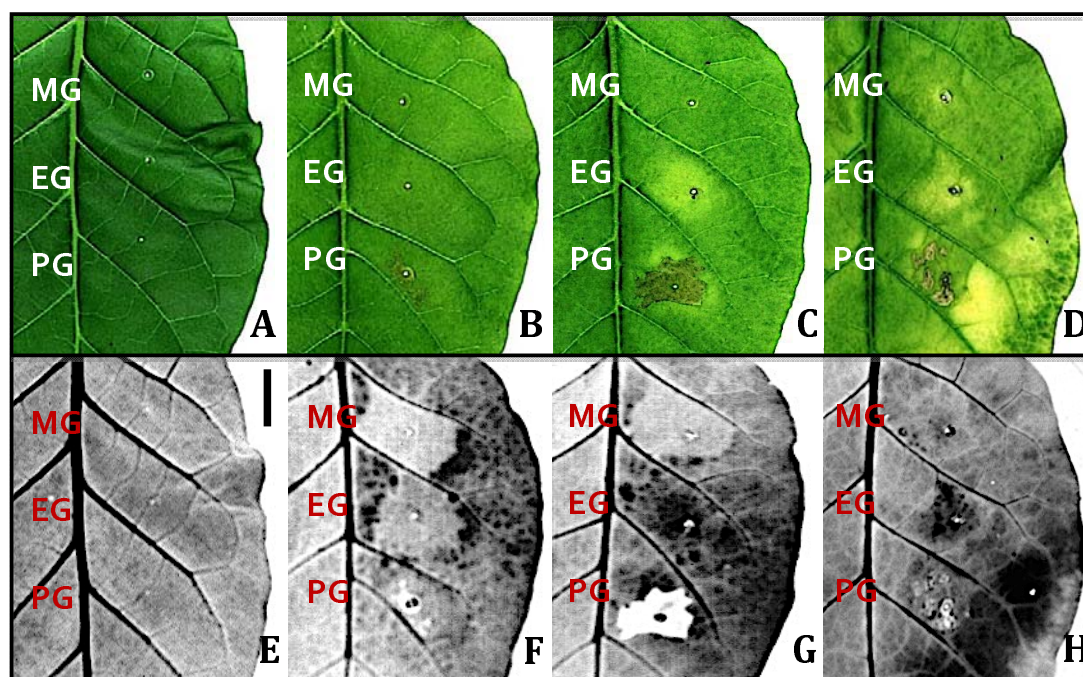

Fig.3

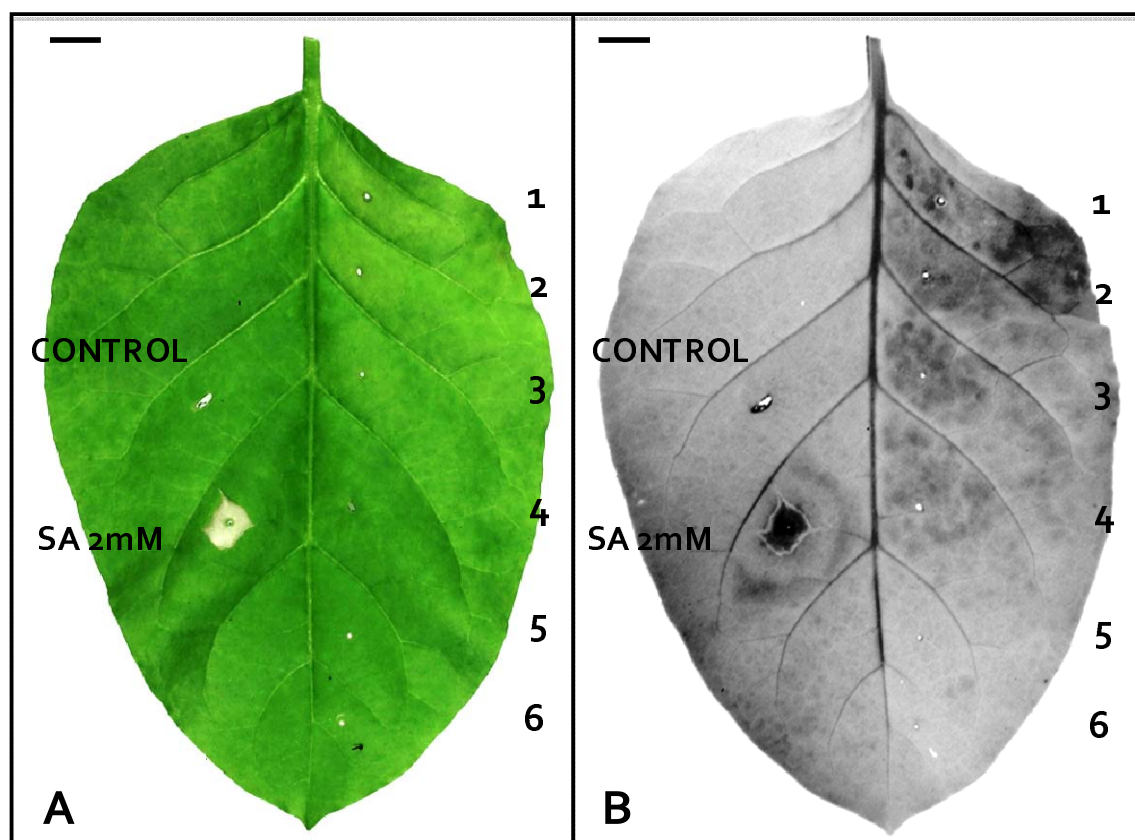

Fig.4

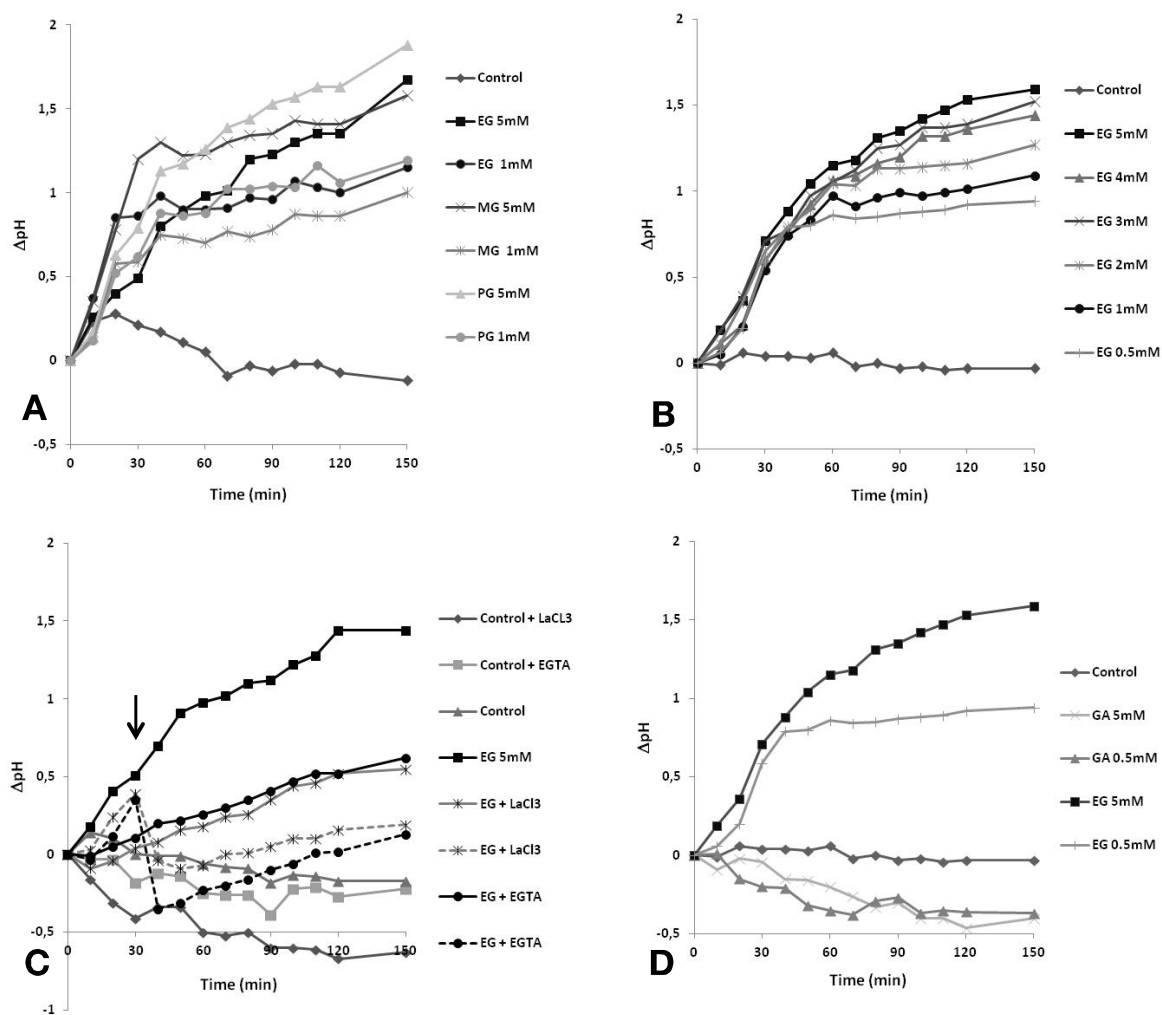

Fig.5

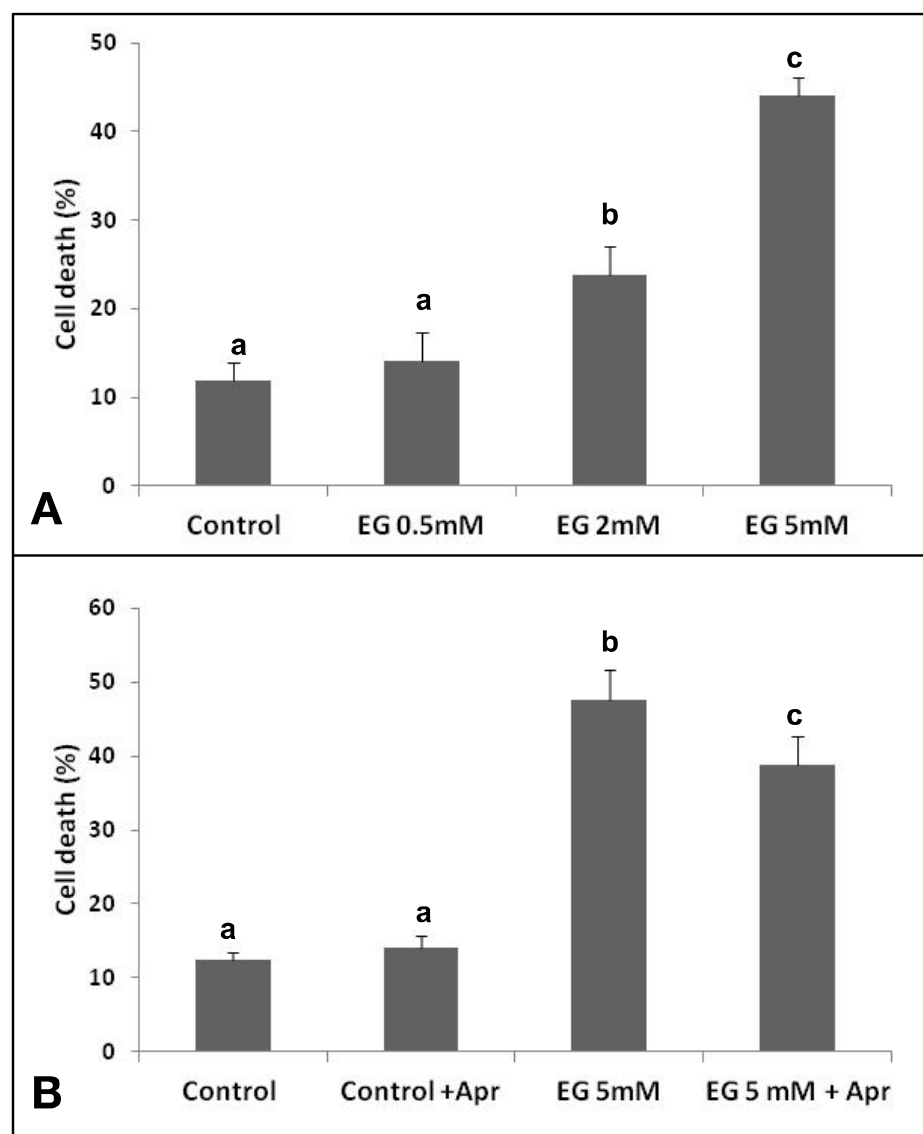

Fig.6

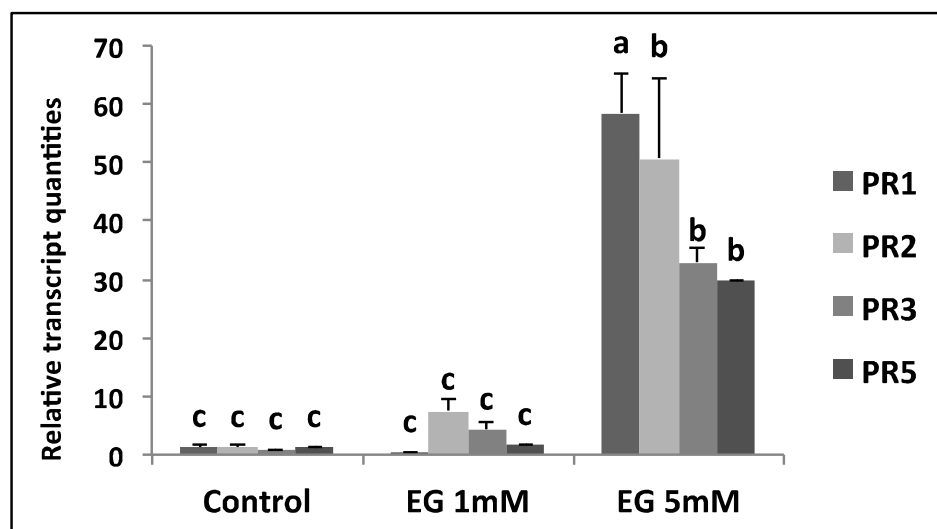

Source: http://biorxiv.org/content/10.1101/145425v1.full.pdf
